# Supplementary material for: Core–shell metal–organic frameworks and hierarchical host–guest structures toward water-stable luminescence of lanthanide complexes in encoding beads
Source: Royal Society of Chemistry journal article supplement (doi:10.1039/d0tc00908c), 2020-01-01
Supplement: d0tc00908c1.pdf [file d0tc00908c1.pdf]

## Supplementary Information

### Core-shell metal-organic frameworks and hierarchical host-guest structures toward water-stable luminescence of lanthanide complexes in encoding beads

Dong Mo, Zhengqiang Wang, Kaiyao Sun, Xiyue Xie, Jixi Zhang\*, Kaiyong Cai\*

Key Laboratory of Biorheological Science and Technology, Ministry of Education, College of Bioengineering, Chongqing University, No. 174 Shazheng Road, Chongqing 400044, China  
E-mail: jixizhang@cqu.edu.cn, kaiyong\_cai@cqu.edu.cn.

#### 1. Characterization

Transmission electron microscopy (TEM) images were performed on a JEM 2010 (JEOL, Japan) instrument with 200 kV acceleration voltages in order to investigate the size, morphology and integrity of nanoparticles. Samples were dried on holey carbon-coated Cu grids before characterization. The bulk and surface chemical compositions of samples were analyzed with HAADF-STEM (high-angle annular dark-field imaging, scanning transmission electron microscope) and elemental mapping images via a JEM-6700F instrument (JEOL, Japan).

Powder X-ray diffraction (XRD) measurements were obtained using Bruker D8 (Germany) Advance X-Ray powder diffractometer (40 kV, 40 mA, CuK $\alpha$ 1 radiation of  $\lambda = 1.54059 \text{ \AA}$ ) with a scan speed of  $2^\circ/\text{min}$  and a step size of  $0.02^\circ$ .

Nitrogen sorption isotherms were measured through an ASAP 2010 analyzer (Micromeritics, USA).

XPS analysis was determined by an Axis Ultra spectrometer (Kratos, UK) with Al K $\alpha$  excitation radiation at ca.  $5 \times 10^{-9} \text{ Pa}$ .

Fourier transform infrared (FTIR) spectra were recorded on a Spectrum 100 infrared spectrophotometer (PerkinElmer, USA) at a test range of  $400\text{-}4000 \text{ cm}^{-1}$  using the KBr pellet

technique.

The contact angles for water on the surfaces of the as-obtained particles films were carried out using a JY-PHa optical contact angle meter (JY-PHa, JinHe Machine, China) at room temperature. The values of contact angles were obtained within 20 s after depositing and drying 1 mL of particle suspension ( $15 \text{ mg mL}^{-1}$ ) on a titanium sheet.

Thermogravimetric analysis (TGA) was performed with a Q500 instrument (TA Instruments, USA). The samples were tested under an air atmosphere from  $25^\circ\text{C}$  to  $900^\circ\text{C}$  at a heating rate of  $10^\circ\text{C}/\text{min}$ .

The UV-vis absorption was recorded on a UV-Vis spectrofluorometer (NanoDrop One, Thermo). Fluorescence spectra was recorded on a fluorescence spectrophotometer (RF-6000, Shimadzu, Japan) using a xenon lamp as excitation source.

Fluorescence quantum yield (QY) was collected using an integrating sphere (FS5, Edinburgh Instruments), and the luminescence lifetime data were determined independently using a fluorescence spectrophotometer (FLS920, Edinburgh Instruments). The employed excitation wavelength was 304 nm and emission wavelength was 543 nm.

## 2. Supporting Figures

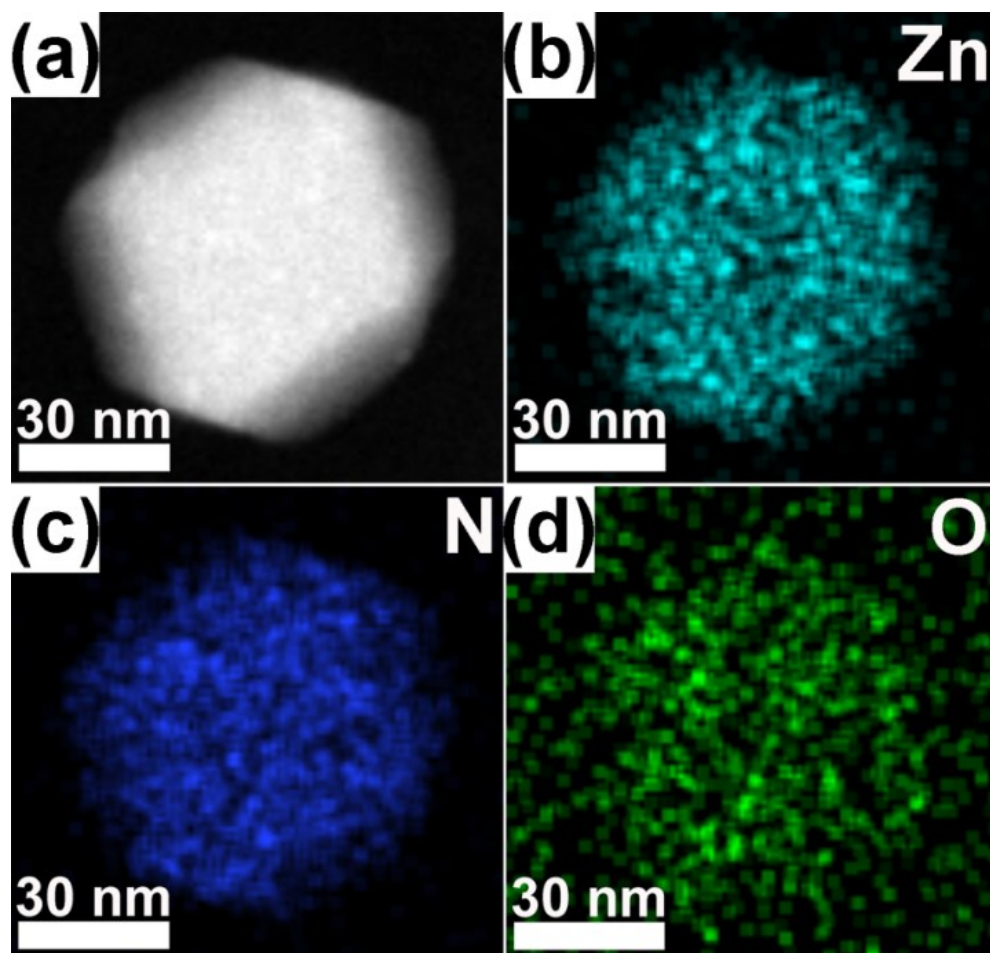

**Fig. S1** HAADF-STEM (a) and EDS mapping images (b, c, d) showing distributions of Tbx@ZIF-8@ZIF-90 NPs.

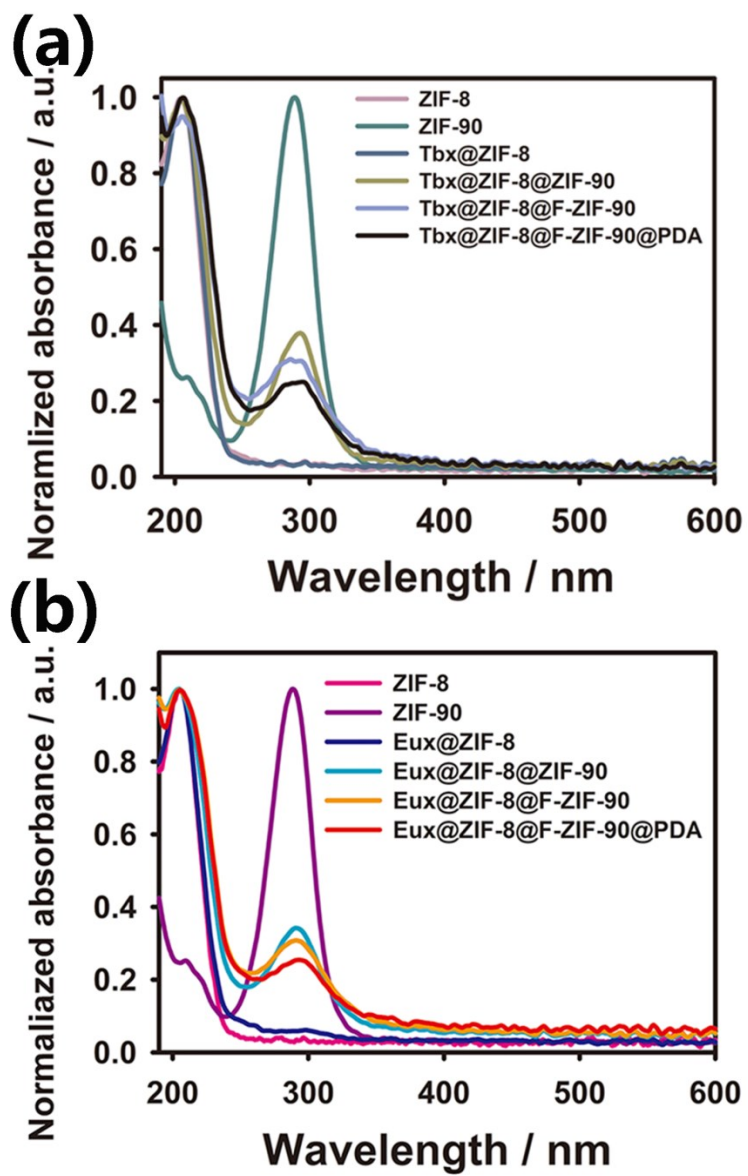

Fig. S2 Normalized UV-Vis absorption spectra of all optical particles coated Tb (a) or Eux (b), ZIF-90 NPs, and ZIF-8 NPs.

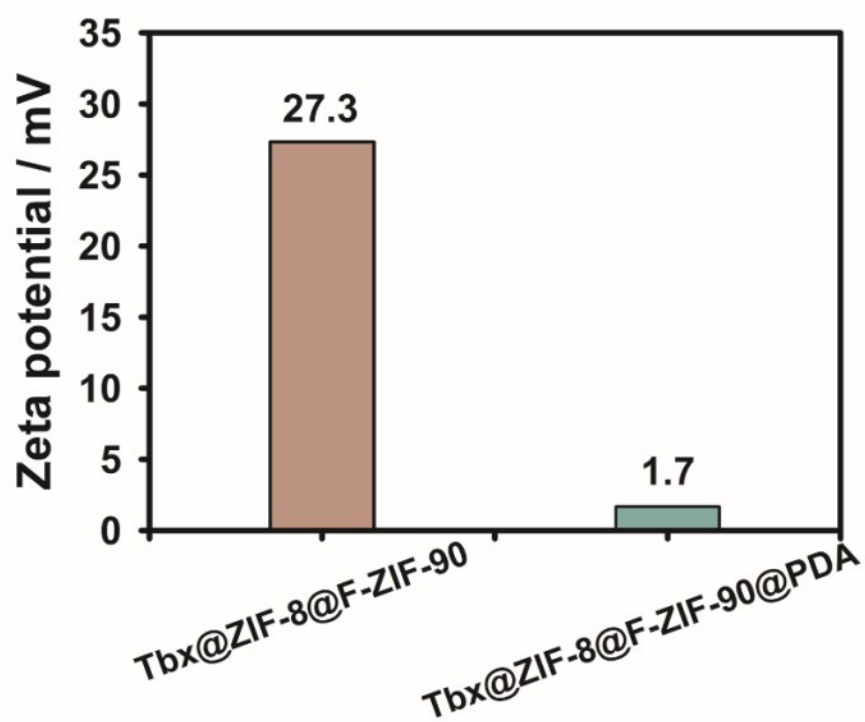

**Fig. S3** Zeta potential changes of Tbx@ZIF-8@ZIF-90 NPs and Tbx@ZIF-8@F-ZIF-90@PDA NPs.

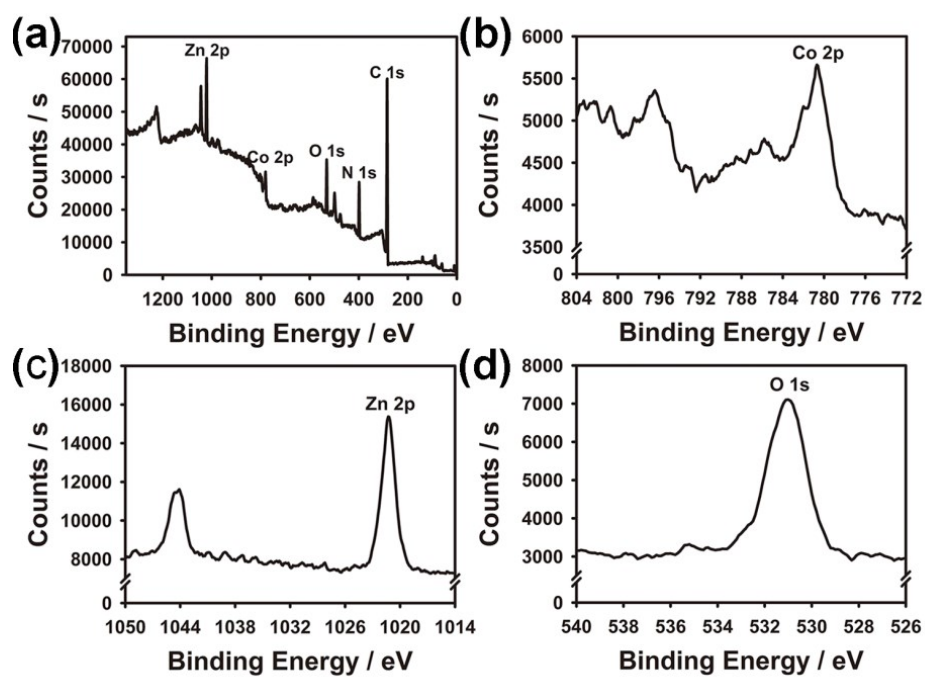

**Fig. S4** XPS survey of ZIF-67@ZIF-90 NPs (a), and corresponding high-resolution scans of the Co 2p (b), Zn 2p (c), and O 1s (d) peak from the XPS spectra of nanoparticles.

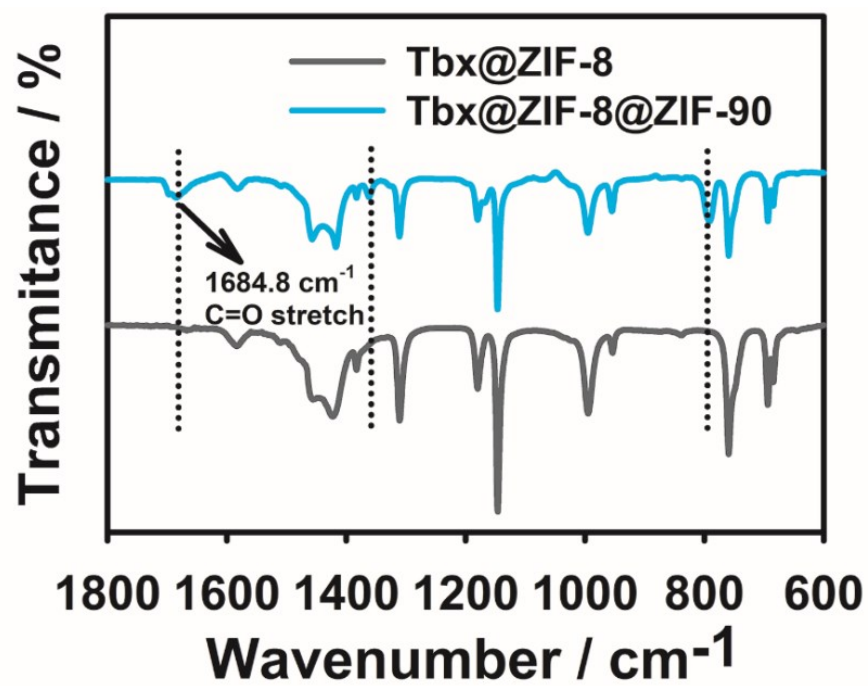

Fig. S5 FT-IR spectra of Tbx@ZIF-8 NPs and Tbx@ZIF-8@ZIF-90 NPs.

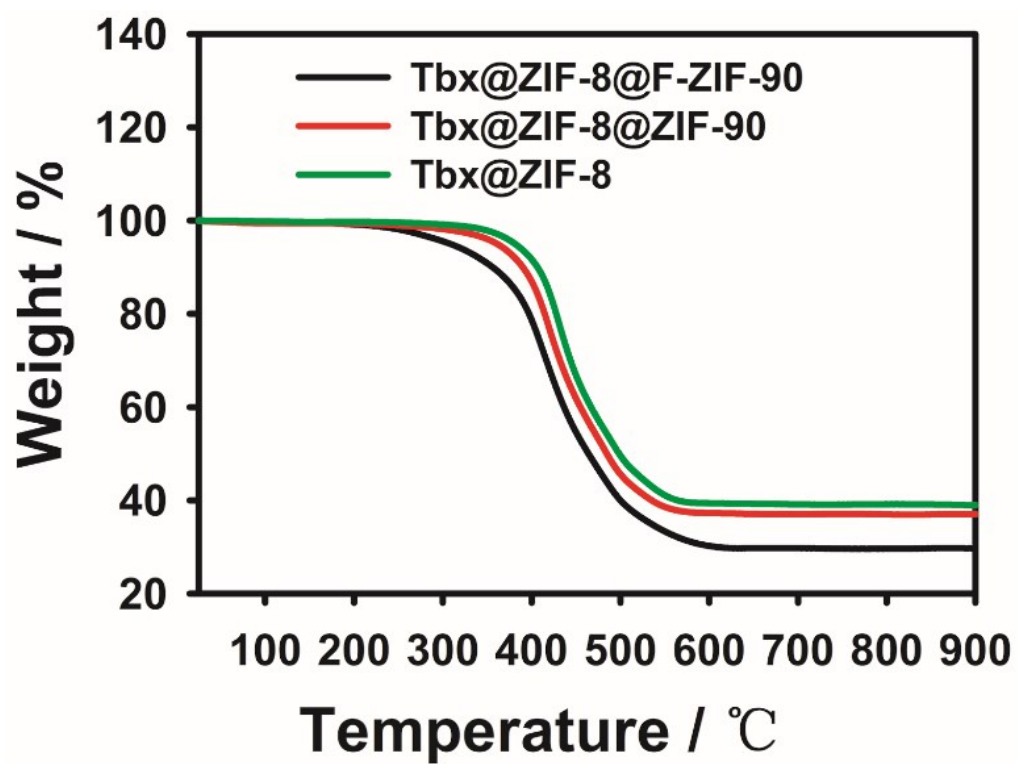

**Fig. S6** TGA curves of Tbx@ZIF-8 NPs (green line), Tbx@ZIF-8@ZIF-90 NPs (red line) and Tbx@ZIF-8@F-ZIF-90 NPs (black line).



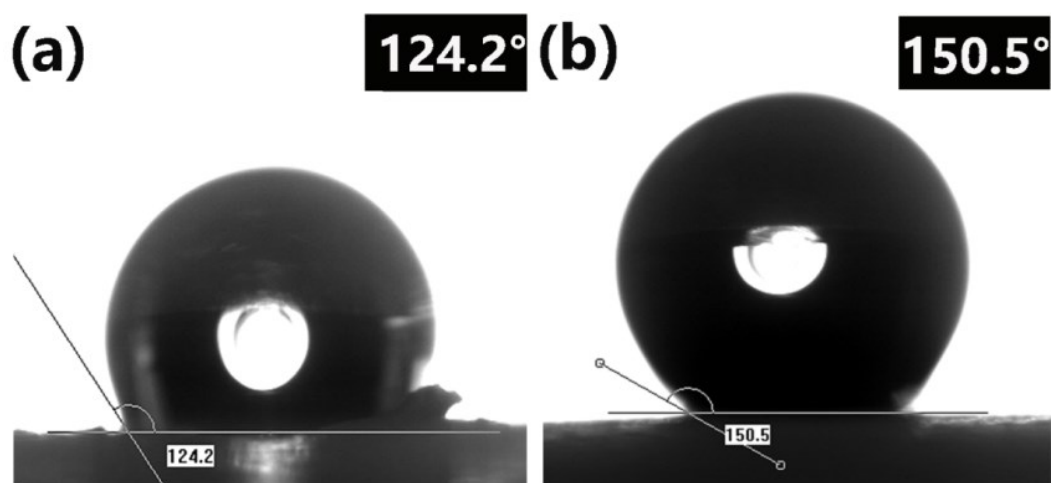

**Fig. S7** Measurement of the contact angle with the water for Tbx@ZIF-8@F-ZIF-90 NPs: ZIF-90 shell by one-step synthesis (a) and F-ZIF-90 NPs (b); 2, 4, 6-trifluorobenzyl amine as fluorinating agent.

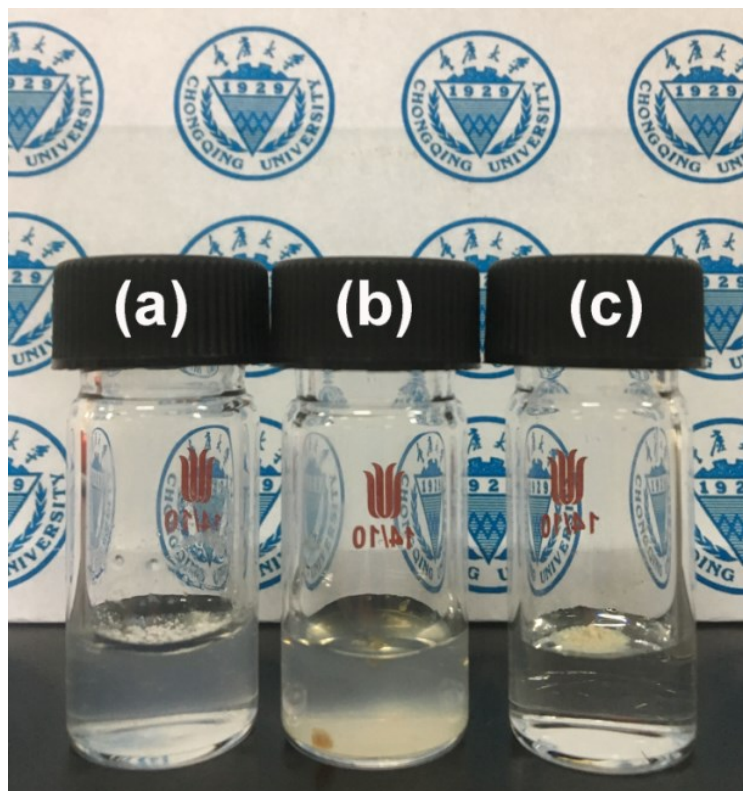

**Fig. S8** Digital photographs of Tbx@ZIF-8 (a), Tbx@ZIF-8@ZIF-90 (b), and Tbx@ZIF-8@F-ZIF-90 (c) samples dispersed in water solution.



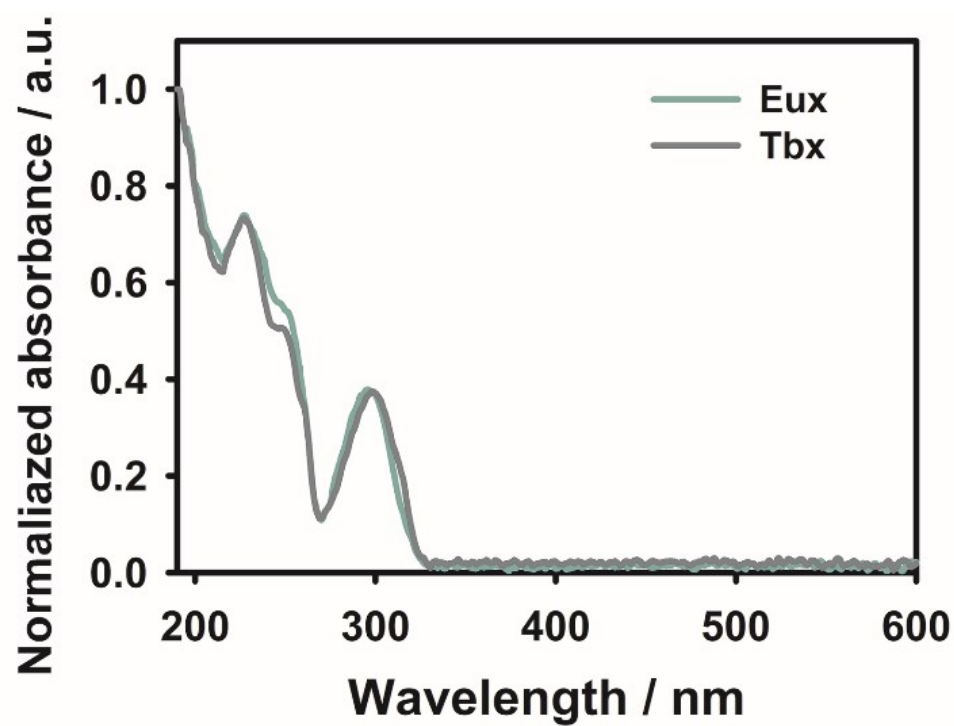

Fig. S10 Normalized UV-Vis absorption spectra of Eux and Tbx.

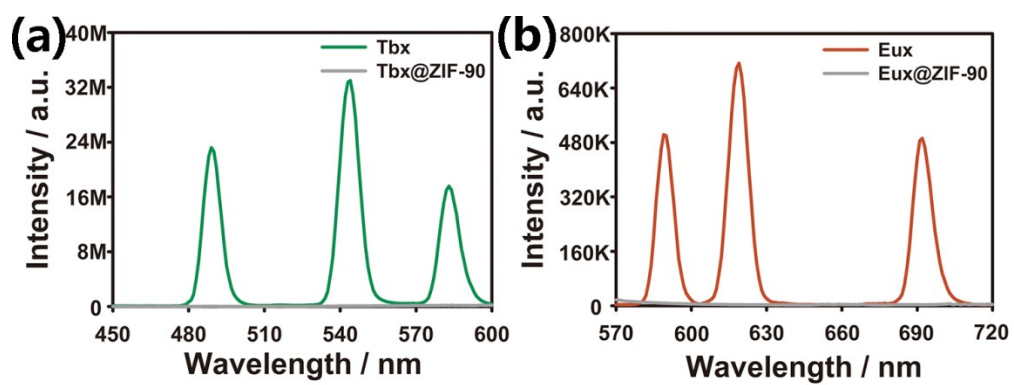

**Fig. S11** Photoluminescence spectra of Tb<sup>3+</sup> and Tb<sup>3+</sup>@ZIF-90 NPs (a); Eu<sup>3+</sup> and Eu<sup>3+</sup>@ZIF-90 NPs

(b).

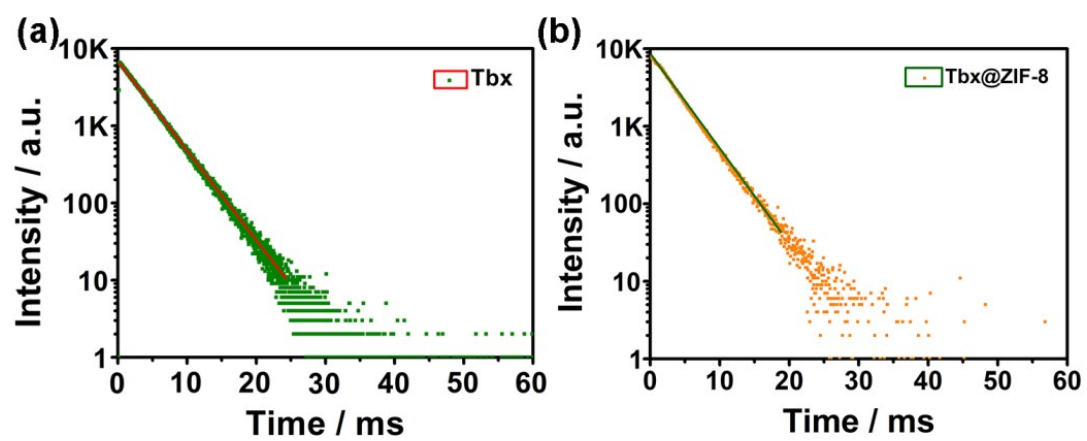

Fig. S12 Time-resolved luminescence decay curves of Tbx (a) and Tbx@ZIF-8 NPs (b).

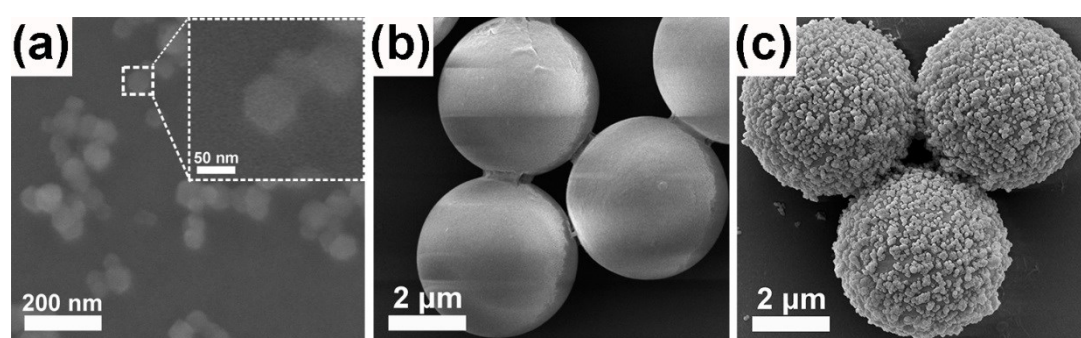

**Fig. S13** SEM images of the non-fluorescent ZIF-8@F-ZIF-90@PDA NPs (a), NH<sub>2</sub>-PS (b) and fluorescent encoding beads (c) at medium magnification.

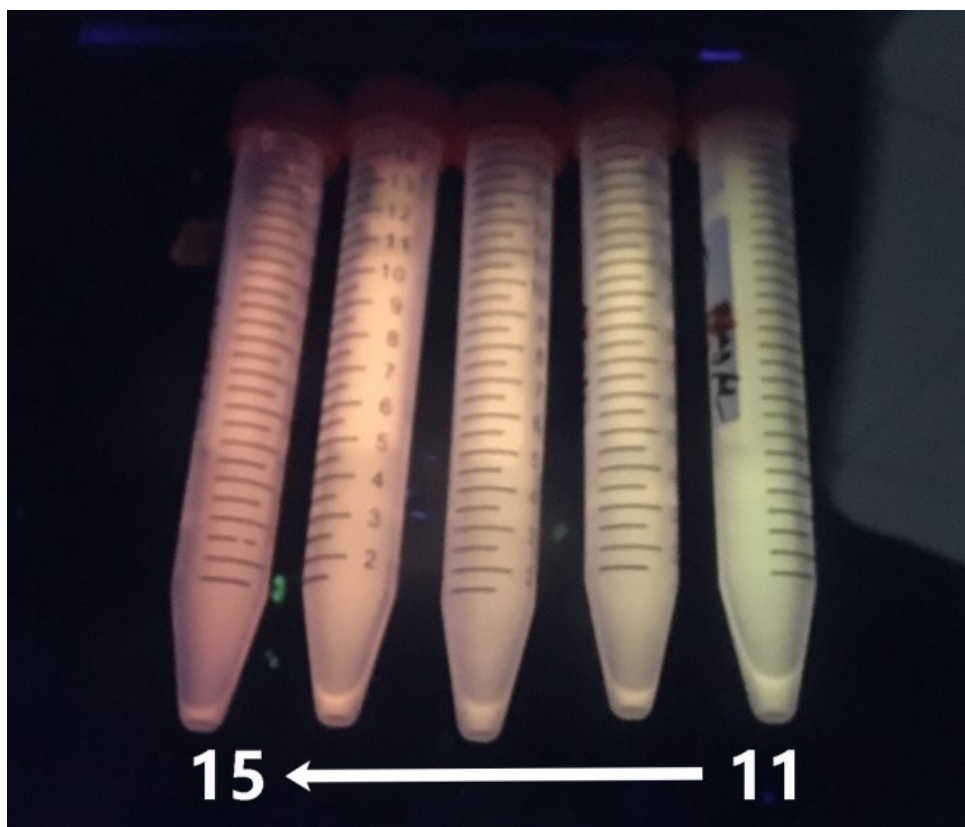

**Fig. S14** Digital photographs of DEBs dispersed in aqueous solution.



**Table S1** Summarized photophysical properties of the suspensions of Tbx, Tbx@ZIF-8 NPs and Tbx@ZIF-8@F-ZIF-90 NPs. Particles were suspended in PBS buffer (pH 7.4) at a fixed concentration of 0.1 mg mL<sup>-1</sup>.

| Sample name            | $\Phi^a_{\text{PBS}}/\%$ | $\tau^b_{\text{PBS}}/\text{ms}$ |
|------------------------|--------------------------|---------------------------------|
| Tbx                    | -                        | 2.2                             |
| Tbx@ZIF-8              | 13.4                     | 2.0                             |
| Tbx@ZIF-8@F-ZIF-90@PDA | 19.1                     | 1.8                             |

**a:** Absolute luminescence QYs of particles suspended in PBS buffer (pH 7.4).

**b:** Lifetime  $\tau$  of particles suspended in PBS buffer (pH 7.4). The samples were freshly prepared in PBS and immediately utilized for QY and lifetime measurements.

**Table S2** Single-color encoding formula and the resulting fluorescence properties of EBs base on Tbx NPs and NF NPs.

| SEBs | Tbx NPs<br>% | NF NPs<br>% | Fluorescence intensity<br>(a.u.)<br>543 nm |
|------|--------------|-------------|--------------------------------------------|
| 1    | 100          | 0           | 3898                                       |
| 2    | 85           | 15          | 2921                                       |
| 3    | 70           | 30          | 1702                                       |
| 4    | 55           | 45          | 1143                                       |
| 5    | 40           | 60          | 760                                        |

**Table S3** Single-color encoding formula and the resulting fluorescence properties of EBs base on Eux NPs and NF NPs.

| SEBs | Eux NPs<br>% | NF NPs<br>% | Fluorescence intensity<br>(a.u.)<br>617 nm |
|------|--------------|-------------|--------------------------------------------|
| 6    | 100          | 0           | 3971                                       |
| 7    | 90           | 10          | 2706                                       |
| 8    | 80           | 20          | 1946                                       |
| 9    | 70           | 30          | 1526                                       |
| 10   | 60           | 40          | 997                                        |

**Table S4** Double-color encoding formula and the resulting fluorescence properties of EBs base on Tbx NPs, Eux NPs and NF NPs.

| DEBs | Tbx NPs<br>% | NF NPs<br>% | Eux NPs<br>% | Fluorescence intensity<br>(a.u.) |        |
|------|--------------|-------------|--------------|----------------------------------|--------|
|      |              |             |              | 543 nm                           | 617 nm |
| 11   | 22           | 48          | 30           | 3152                             | 1056   |
| 12   | 19           | 36          | 45           | 2721                             | 1470   |
| 13   | 16           | 24          | 60           | 2231                             | 1894   |
| 14   | 13           | 12          | 75           | 1161                             | 2463   |
| 15   | 10           | 0           | 90           | 1308                             | 2804   |
